# Supplementary material for: Creation of a Métis-Specific Instrument for Cancer Screening: A Scoping Review of Cancer-Screening Programs and Instruments
Source: MDPI journal article supplement (doi:10.3390/curroncol30110715), 2023-11-09
Supplement: s1 [file s1]

**Table S1. Indigenous-specific Articles on Cancer Screening included from the Scoping Review**

| <b>Author<br/>(Year)</b>               | <b>Study<br/>Design</b>                                    | <b>N</b>    | <b>Age (Years)</b> | <b>Target<br/>Population</b>               | <b>Region</b>                                               | <b>Cancer<br/>Screening<br/>(Breast/Cervical<br/>/Colorectal)</b> | <b>Instrument<br/>Included</b> | <b>Validated</b> |
|----------------------------------------|------------------------------------------------------------|-------------|--------------------|--------------------------------------------|-------------------------------------------------------------|-------------------------------------------------------------------|--------------------------------|------------------|
| Cerigo et al.,<br>2011 [30]            | Cross-<br>Sectional                                        | 175 females | 18-69              | Inuit                                      | Canada<br>(Nunavik,<br>Quebec)                              | Cervical                                                          | Yes                            | Yes              |
| Smith et al.,<br>2004 [35]             | Community<br>-based<br>participator<br>y research<br>model | 100 women   | 18+                | Apsáalooke                                 | United States<br>(Crow Indian<br>Reservation)               | Cervical                                                          | Yes                            | Yes              |
| Ndikum-<br>Moffor et al.,<br>2013 [38] | Qualitative                                                | 53 females  | 40+                | American<br>Indian/<br>Alaskan<br>Native   | United States                                               | Breast                                                            | Yes                            | No               |
| Wampler et<br>al., 2006 [39]           | Case-<br>Control                                           | 271 females | ≤41                | American<br>Indian<br>(Northern<br>Plains) | United States<br>(Northern<br>Plains Indian<br>Reservation) | Breast                                                            | Yes                            | Yes              |
| Brown et al.,<br>2011 [40]             | Qualitative                                                | 250 females | 18+                | Hopi                                       | United States<br>(Hopi<br>Reservation)                      | Breast                                                            | Yes                            | Yes              |
| Brown et al.,<br>2015 [41]             | Qualitative                                                | 252 females | NA                 | Hopi                                       | United States<br>(Hopi<br>Reservation)                      | Breast, cervical,<br>colorectal                                   | No                             | No               |

|                             |                          |                                               |                                                                        |                                                                                                                                |                                                            |                              |     |     |
|-----------------------------|--------------------------|-----------------------------------------------|------------------------------------------------------------------------|--------------------------------------------------------------------------------------------------------------------------------|------------------------------------------------------------|------------------------------|-----|-----|
| Chow et al., 2020 [45]      | Qualitative              | 841 total (685 females, 156 males)            | Not specified but noted 21-74 age group included in screening programs | First Nations                                                                                                                  | Canada (Northwestern Ontario)                              | Breast, cervical, colorectal | Yes | No  |
| Engelman al., 2010 [46]     | Mixed Methods            | 12 focus groups, 8 to 12 females per group    | 40+                                                                    | American Indian/ Alaskan Native                                                                                                | United States                                              | Breast                       | No  | Yes |
| Haverkamp et al., 2011 [47] | Qualitative              | 227                                           | NA                                                                     | Indian Health Service (IHS) and tribal providers                                                                               | United States                                              | Colorectal                   | Yes | No  |
| Moreland et al., 2006 [48]  | Cross-Sectional          | 116 females (48 Hispanic, 68 Native American) | 18-89                                                                  | Hispanic, Native American                                                                                                      | United States                                              | Cervical                     | Yes | No  |
| Orians et al., 2004 [49]    | Multiple-site Case Study | 141 females                                   | NA                                                                     | Arctic Slope Native Association, Cherokee Nation, Cheyenne River Sioux Tribe, Southcentral Foundation, South Puget Intertribal | United States (Alaska, Oklahoma, South Dakota, Washington) | Cervical, breast             | No  | No  |

|                             |                 |                                |       |                 |               |            |     |     |
|-----------------------------|-----------------|--------------------------------|-------|-----------------|---------------|------------|-----|-----|
|                             |                 |                                |       | Planning Agency |               |            |     |     |
| Sanderson et al., 2011 [50] | Cross-Sectional | 285 total (228 women, 55 men)  | 18-79 | Navajo          | United States | Colorectal | Yes | No  |
| Solomon et al., 1999 [51]   | Cross-Sectional | 199 Women                      | 18-40 | American Indian | United States | Cervical   | Yes | Yes |
| Soonhee et al., 2016 [52]   | Cross-Sectional | 181 total (97 female, 84 male) | 50+   | American Indian | United States | Colorectal | Yes | No  |

## References

30. Cerigo H, Macdonald ME, Franco EL, Brassard P. Awareness and knowledge about human papillomavirus among Inuit women in Nunavik, Quebec. *J Community Health*. 2011;36(1):56-62. 10.1007/s10900-010-9278-x.
35. Smith A, Christopher S, McCormick AK. Development and implementation of a culturally sensitive cervical health survey: a community-based participatory approach. *Women Health*. 2004;40(2):67-86. [https://doi.org/10.1300/J013v40n02\\_05](https://doi.org/10.1300/J013v40n02_05).
38. Ndikum-Moffor FM, Braiuca S, Daley CM, Gajewski BJ, Engelman KK. Assessment of mammography experiences and satisfaction among American Indian/Alaska Native women. *Womens Health Issues*. 2013;23(6):e395-402. 10.1016/j.whi.2013.08.003.
39. Wampler NS, Ryschon T, Manson SM, Buchwald D. Knowledge, Attitudes, and Beliefs Regarding Breast Cancer Among American Indian Women From the Northern Plains. *Journal of Applied Gerontology*. 2006;25(1\_suppl):44S-59S. 10.1177/0733464805282729.
40. Brown SR, Nuno T, Joshweseoma L, Begay RC, Goodluck C, Harris RB. Impact of a community-based breast cancer screening program on Hopi women. *Preventive medicine*. 2011;52(5):390-3. 10.1016/j.ypmed.2011.02.012.

41. Brown SR, Joshweseoma L, Saboda K, Sanderson P, Ami D, Harris R. Cancer screening on the Hopi reservation: A model for success in a Native American community. *Journal of Community Health: The Publication for Health Promotion and Disease Prevention*. 2015;40(6):1165-72. <http://dx.doi.org/10.1007/s10900-015-0043-z>.
45. Chow S, Bale S, Sky F, Wesley S, Beach L, Hyett S, Heiskanen T, Gillis K-J, Paroschy Harris C. The Wequedong Lodge Cancer Screening Program: implementation of an opportunistic cancer screening pilot program for residents of rural and remote Indigenous communities in Northwestern Ontario, Canada. *Rural and remote health*. 2020;20(1):5576. 10.22605/RRH5576.
46. Engelman KK, Daley CM, Gajewski BJ, Ndikum-Moffor F, Faseru B, Braiuca S, Joseph S, Ellerbeck EF, Greiner KA. An assessment of American Indian women's mammography experiences. *BMC Womens Health*. 2010;10:34. 10.1186/1472-6874-10-34.
47. Haverkamp D, Perdue DG, Espey D, Cobb N. A survey of Indian Health Service and tribal health providers' colorectal cancer screening knowledge, perceptions, and practices. *J Health Care Poor Underserved*. 2011;22(1):243-57. 10.1353/hpu.2011.0014.
48. Moreland S, Engelman K, Greiner KA, Mayo MS. Papanicolaou testing among Native American and Hispanic populations. *Ethn Dis*. 2006;16(1):223-7.
49. Orians CE, Erb J, Kenyon KL, Lantz PM, Liebow EB, Joe JR, Burhansstipanov L. Public education strategies for delivering breast and cervical cancer screening in American Indian and Alaska Native populations. *Journal of public health management and practice : JPHMP*. 2004;10(1):46-53. 10.1097/00124784-200401000-00009.
50. Sanderson PR, Weinstein N, Teufel-Shone N, Martínez ME. Assessing colorectal cancer screening knowledge at tribal fairs. *Prev Chronic Dis*. 2011;8(1):A16.
51. Solomon TG, Gottlieb NH. Measures of American Indian traditionality and its relationship to cervical cancer screening. *Health care for women international*. 1999;20(5):493-504.
52. Soonhee R, Burnette CE, Kyoung Hag L, Yeon-Shim L, Goins RT. Correlates of Receipt of Colorectal Cancer Screening among American Indians in the Northern Plains. *Social Work Research*. 2016;40(2):95-104. 10.1093/swr/svw006.
